# Supplementary material
Source: Springer Nature journal article supplement (https://www.springermedizin.de/resource/supplementary/13012_2013_640_MOESM3_ESM.pdf/9630426)
Supplement: MOESM3 [file 9630426]

| Study Timeline                         | Year 2                                                                    |     |     |     |     |     |     |     |     |     |     |     | Year 3 |     |     |     |     |     |     |     |     |     |     |     | Year 4 |     |     |     |     |     |     |     |     |     |     |     | Year 5 |     |     |     |     |     |     |     |     |     |     |     |      |     |     |     |     |     |     |     |     |     |     |     |       |  |  |  |  |  |  |  |  |  |  |  |   |  |  |  |  |  |  |  |  |  |  |  |
|----------------------------------------|---------------------------------------------------------------------------|-----|-----|-----|-----|-----|-----|-----|-----|-----|-----|-----|--------|-----|-----|-----|-----|-----|-----|-----|-----|-----|-----|-----|--------|-----|-----|-----|-----|-----|-----|-----|-----|-----|-----|-----|--------|-----|-----|-----|-----|-----|-----|-----|-----|-----|-----|-----|------|-----|-----|-----|-----|-----|-----|-----|-----|-----|-----|-----|-------|--|--|--|--|--|--|--|--|--|--|--|---|--|--|--|--|--|--|--|--|--|--|--|
| Calendar Yr.                           | 2011                                                                      |     |     |     |     |     |     |     |     |     |     |     | 2012   |     |     |     |     |     |     |     |     |     |     |     | 2013   |     |     |     |     |     |     |     |     |     |     |     | 2014   |     |     |     |     |     |     |     |     |     |     |     | 2015 |     |     |     |     |     |     |     |     |     |     |     |       |  |  |  |  |  |  |  |  |  |  |  |   |  |  |  |  |  |  |  |  |  |  |  |
|                                        | Jan                                                                       | Feb | Mar | Apr | May | Jun | Jul | Aug | Sep | Oct | Nov | Dec | Jan    | Feb | Mar | Apr | May | Jun | Jul | Aug | Sep | Oct | Nov | Dec | Jan    | Feb | Mar | Apr | May | Jun | Jul | Aug | Sep | Oct | Nov | Dec | Jan    | Feb | Mar | Apr | May | Jun | Jul | Aug | Sep | Oct | Nov | Dec | Jan  | Feb | Mar | Apr | May | Jun | Jul | Aug | Sep | Oct | Nov | Dec |       |  |  |  |  |  |  |  |  |  |  |  |   |  |  |  |  |  |  |  |  |  |  |  |
| <b>Blood Pressure Intervention</b>     | Implemented at all 6 participating JHCP sites between 4/13/11 and 3/31/11 |     |     |     |     |     |     |     |     |     |     |     |        |     |     |     |     |     |     |     |     |     |     |     |        |     |     |     |     |     |     |     |     |     |     |     |        |     |     |     |     |     |     |     |     |     |     |     |      |     |     |     |     |     |     |     |     |     |     |     |       |  |  |  |  |  |  |  |  |  |  |  |   |  |  |  |  |  |  |  |  |  |  |  |
| <b>Care Management Intervention</b>    | Not Implemented in 2011                                                   |     |     |     |     |     |     |     |     |     |     |     | B      |     |     |     |     |     |     |     |     |     |     |     | D & E  |     |     |     |     |     |     |     |     |     |     |     | A      |     |     |     |     |     |     |     |     |     |     |     | F    |     |     |     |     |     |     |     |     |     |     |     | C     |  |  |  |  |  |  |  |  |  |  |  |   |  |  |  |  |  |  |  |  |  |  |  |
| <b>Provider Education Intervention</b> | Not Implemented in 2011                                                   |     |     |     |     |     |     |     |     |     |     |     |        |     |     |     |     |     |     |     |     |     |     |     | A      |     |     |     |     |     |     |     |     |     |     |     | F      |     |     |     |     |     |     |     |     |     |     |     | B    |     |     |     |     |     |     |     |     |     |     |     | D & E |  |  |  |  |  |  |  |  |  |  |  | C |  |  |  |  |  |  |  |  |  |  |  |

- A: Site A
- B: Site B
- C: Site C
- D: Site D
- E: Site E
- F: Site F
